# Supplementary material
Source: Springer Nature journal article supplement (https://www.springermedizin.de/resource/supplementary/40345_2013_4_MOESM1_ESM.pdf/25658332)

# Mean MADRS Score

Score

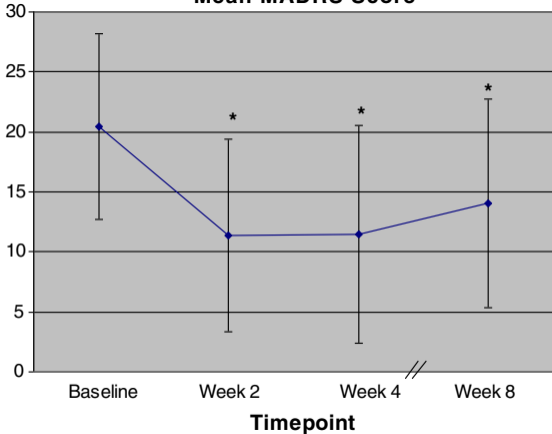

\*  $P < 0.0005$  over Time (ANOVA)

Supplement: MOESM1 [file 25658332]
